# Supplementary material
Source: PubMed Central journal article supplement (PMC4041713)
Supplement: NIHMS589041-supplement-01.pdf [file NIHMS589041-supplement-01.pdf]

## Supplemental Data

**Table S1:** Patient demographic characteristics for sample microRNA expression analyses.

| Institution                              | RNA Source | Groups           | Age (years) | Race (W/B/O) <sup>a</sup> | Gender (M/F) | FVC <sup>b</sup> (% predicted) |
|------------------------------------------|------------|------------------|-------------|---------------------------|--------------|--------------------------------|
| The Ohio State University Medical Center | Lung       | Control (n = 4)  | 52.7 ± 4.4  | 3/1/0                     | 2/2          |                                |
|                                          |            | Sarcoid (n = 4)  | 51.8 ± 3.8  | 2/2/0                     | 1/3          | 86.5 ± 3.6                     |
|                                          | Lymph Node | Control (n = 4)  | 46.4 ± 5.9  | 2/2/0                     | 2/2          |                                |
|                                          |            | Sarcoid (n = 4)  | 45.0 ± 5.5  | 2/2/0                     | 2/2          | 85.7 ± 6.6                     |
|                                          | PBMC       | Control (n = 5)  | 45.8 ± 3.1  | 4/1/0                     | 3/2          |                                |
|                                          |            | Sarcoid (n = 10) | 50.6 ± 2.9  | 7/3/0                     | 4/6          | 90.9 ± 4.2                     |
| Oregon Health and Science University     | Lymph Node | Control (n = 7)  | 45.1 ± 3.2  | 5/1/1                     | 4/3          |                                |
|                                          |            | Sarcoid (n = 7)  | 45.6 ± 5.3  | 6/0/1                     | 4/3          | 83.6 ± 4.4                     |

<sup>a</sup>White/Black/Other

<sup>b</sup>Forced Vital Capacity

| <b>MicroRNA</b> | <b>Assay Number</b> |
|-----------------|---------------------|
| has-miR-92b     | 286                 |
| has-miR-22      | 398                 |
| has-miR-204     | 508                 |
| has-miR-302c#   | 534                 |
| has-miR-25      | 403                 |
| has-miR-199a-5p | 498                 |
| has-miR-214     | 517                 |
| has-miR-216     | 519                 |
| has-miR-383     | 573                 |
| has-miR-486-5p  | 1278                |
| has-miR-19b     | 396                 |
| has-miR-16      | 391                 |

**Table S2.** MicroRNA Assay Index File (AIF) numbers corresponding to each miRNA sequence used for qRT-PCR validation. See the following website for detailed primer sequences:  
[http://www6.appliedbiosystems.com/support/miRNA\\_aif.xls](http://www6.appliedbiosystems.com/support/miRNA_aif.xls)

**Table S3:** The most differentially expressed transcripts (Sarcoidosis vs. Control) identified by genome-wide miRNA expression profiling in human lung tissue.

| <b>Most Overexpressed miRs<sup>a</sup></b> |                        |                             |
|--------------------------------------------|------------------------|-----------------------------|
| <b>miR</b>                                 | <b>Fold Difference</b> | <b>Chromosomal Location</b> |
| 125a                                       | 13.4                   | 19q13.41                    |
| 92a-1                                      | 11.8                   | 13q31.3                     |
| 204                                        | 8.5                    | 9q21.12                     |
| 122a                                       | 7.3                    | 18q21.31                    |
| 206                                        | 7.1                    | 6p12.2                      |
| 1-1                                        | 6.5                    | 20q13.33                    |
| 627                                        | 6.3                    | 15q15.1                     |
| 196a-2                                     | 6.2                    | 12q13.13                    |
| 190                                        | 5.8                    | 15q22.2                     |
| 595                                        | 5.4                    | 7q36.3                      |

| <b>Most Underexpressed miRs<sup>a</sup></b> |                        |                             |
|---------------------------------------------|------------------------|-----------------------------|
| <b>miR</b>                                  | <b>Fold Difference</b> | <b>Chromosomal Location</b> |
| 181a                                        | 0.05                   | 1q32.1                      |
| 590                                         | 0.06                   | 7q11.23                     |
| 22                                          | 0.09                   | 17p13.3                     |
| 597                                         | 0.10                   | 8p23.1                      |
| 329-2                                       | 0.11                   | 14q32.31                    |
| 126-3p                                      | 0.13                   | 9q34.3                      |
| 148b                                        | 0.13                   | 12q13.13                    |
| 518b                                        | 0.13                   | 19q13.42                    |
| 154-5p                                      | 0.15                   | 14q32.31                    |
| 302c                                        | 0.16                   | 4q25                        |

<sup>a</sup> $p$ -value < 0.05, false discovery rate < 0.1

**Table S4:** The most differentially expressed transcripts (Sarcoidosis vs. Control) identified by genome-wide miRNA expression profiling in human peripheral blood mononuclear cells (PBMC).

| <b>Most Overexpressed miRs<sup>a</sup></b> |                        |                             |
|--------------------------------------------|------------------------|-----------------------------|
| <b>miR</b>                                 | <b>Fold Difference</b> | <b>Chromosomal Location</b> |
| 204                                        | 22.5                   | 9q21.12                     |
| 619                                        | 16.5                   | 12q24.11                    |
| 580                                        | 13.0                   | 5p13.2                      |
| 566                                        | 10.5                   | ?                           |
| 596                                        | 9.7                    | 8p23.3                      |
| 214                                        | 8.5                    | 1q24.3                      |
| 589                                        | 8.5                    | 7p22.1                      |
| 579                                        | 8.3                    | 5p13.3                      |
| 598                                        | 8.3                    | 8p23.1                      |
| 616                                        | 8.0                    | 12q13.3                     |

| <b>Most Underexpressed miRs<sup>a</sup></b> |                        |                             |
|---------------------------------------------|------------------------|-----------------------------|
| <b>miR</b>                                  | <b>Fold Difference</b> | <b>Chromosomal Location</b> |
| 199a                                        | 0.06                   | 19p13.2                     |
| 148a                                        | 0.08                   | 7p15.2                      |
| 363-3p                                      | 0.08                   | Xq26.2                      |
| 92-2                                        | 0.09                   | 13q31.3                     |
| 25                                          | 0.11                   | 7q22.1                      |
| 24-5p                                       | 0.13                   | 9q22.32                     |
| 583                                         | 0.13                   | 5q15                        |
| 123                                         | 0.14                   | ?                           |
| 486-5p                                      | 0.14                   | 8p11.21                     |
| 215                                         | 0.16                   | 1q41                        |

<sup>a</sup> $p$ -value < 0.0001, false discovery rate < 0.01

**Figure S1. PCR validation of tissue miRNA differential expression for selected transcripts.**

A subgroup of DE-miRNAs identified by array analysis were validated by PCR in frozen lung tissue [left column: controls (n = 4); sarcoid (n = 4)], frozen lymph node samples [center column: controls (n = 4); sarcoid (n = 4)], and formalin-fixed paraffin-embedded (FFPE) lymph node samples [right column: controls (n = 7); sarcoid (n = 7)].

**Figure S2. PCR validation of PBMC miRNA differential expression for selected transcripts.** Several of the DE-miRNAs identified by miRNA array of PBMC samples were selected for validation by PCR in all of the samples (10 sarcoidosis; 5 controls). The expression trends, significant for 3 of the 6 transcripts, were the same as predicted by the miRNA array analysis.

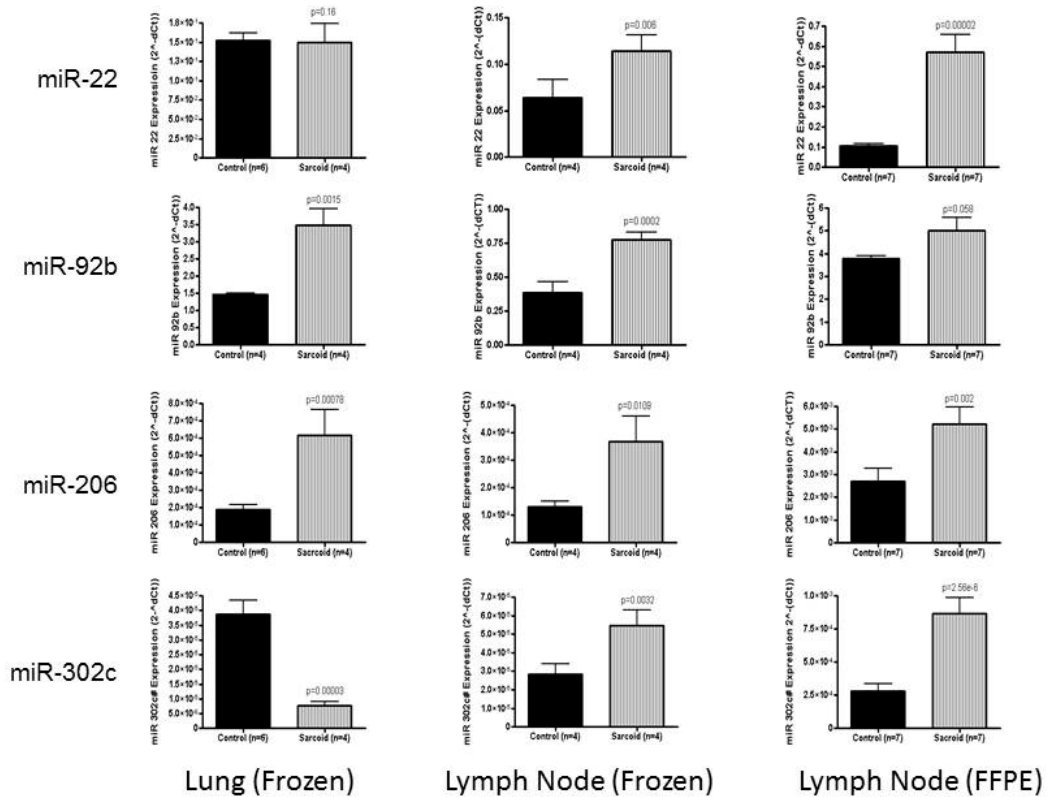

**Figure S1**

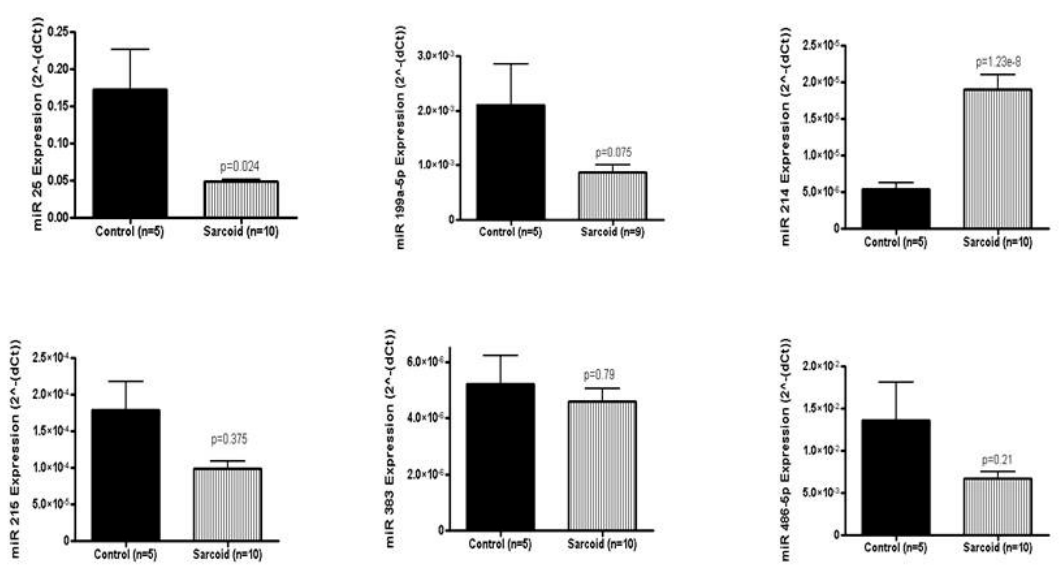

Figure S2
